# Supplementary material
Source: MDPI journal article supplement (https://www.mdpi.com/2073-4441/14/6/944)
Supplement: s1 [file s1]

## Supplementary Materials

A scheme of the DWDS and the drinking water sampling points

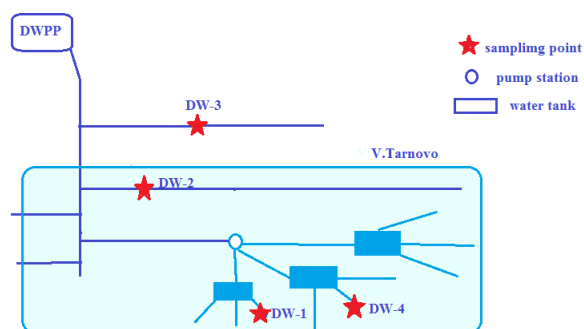

Longitudes and latitude of the DW sampling points:

DW-1 (43.079241N; 25.609019E)

DW-2 (43.073547N; 25.604005E)

DW-3 (43.043731N; 25.620591E)

DW-4 (43.086231N; 25.635262E)

**Table S1.** Data plotted on Figure 1(a). Relative percentage of the bacteria resistant to the individual ABs in drinking water depending on the DW sampling location at the DWDS

| Type of ABs | DW-1       | DW-2       | DW-3      | DW-4        |
|-------------|------------|------------|-----------|-------------|
| <i>AMP</i>  | 0.6 (0.1)  | 0.2 (0.2)  | 3.1 (0.2) | 0.1 (0.003) |
| <i>TE</i>   | 0.1 (0.1)  | 0.2 (0.1)  | 0.4 (0.1) | 0.04 (0.01) |
| <i>C</i>    | 14.6 (1.9) | 18.0 (2.3) | 6.2 (0.4) | 1.0 (0.04)  |
| <i>CIP</i>  | 0.8 (0.2)  | <i>nd</i>  | 3.1 (0.2) | 0.1 (0.005) |
| <i>Sul</i>  | 0.5 (0.1)  | 12.6 (2.9) | 4.3 (3.1) | 0.3 (0.01)  |
| <i>S</i>    | 27.6 (4.1) | 8.3 (2.2)  | 6.2 (0.4) | 9.9 (0.4)   |

*AMP* - ampicillin; *TE* - tetracycline; *C* - chloramphenicol; *CIP* - ciprofloxacin; *Sul* - sulfamethoxazole; *S* – streptomycin;  
In brackets – standard deviation; *nd* - not detected.

**Table S2.** Data plotted on Figure 1(b). Relative percentage of the HPC bacteria resistant to the tested ABs in drinking water-associated biofilms depending on DW sampling location at the DWDS

| AB, mg/l   | DW-1          | DW-2        | DW-3        | DW-4        |
|------------|---------------|-------------|-------------|-------------|
| <i>AMP</i> | 0.1 (0.1)     | 0.03 (0.04) | 0.4 (0.3)   | 0.2 (0.2)   |
| <i>TE</i>  | 0.002 (0.002) | 0.0004 (0)  | 0.06 (0.05) | 0.02 (0.01) |
| <i>C</i>   | 8.6 (5.5)     | 25.4 (22.0) | 15.2 (8.0)  | 2.0 (1.4)   |
| <i>CIP</i> | 1.8 (1.5)     | 0.01 (0.01) | 0.3 (0.1)   | 34.0 (8.7)  |
| <i>Sul</i> | 8.6 (7.6)     | 7.5 (5.6)   | 1.3 (0.5)   | 0.2 (0.2)   |
| <i>S</i>   | 33.2 (14.2)   | 23.8 (17.8) | 24.3 (4.1)  | 54.9 (13.5) |

*AMP* - ampicillin; *TE* - tetracycline; *C* - chloramphenicol; *CIP* - ciprofloxacin; *Sul* - sulfamethoxazole; *S* – streptomycin;  
In brackets – standard deviation.

**Table S3.** Data plotted on Figure 3 (a). Biomass amount of the single-species biofilms of the isolated bacteria in R2A broth

| Strain № | Bacterial taxon                     | Biofilm, OD <sub>590nm</sub> | Plankton, OD <sub>620nm</sub> |
|----------|-------------------------------------|------------------------------|-------------------------------|
| 4-1      | <i>Sphingomonas</i> spp.            | 0.64 (0.07)                  | 0.76 (0.12)                   |
| 4-2      | <i>Sphingomonas</i> spp.            | 0.31 (0.06)                  | 0.39 (0.01)                   |
| 4-4      | <i>Sphingomonas</i> spp.            | 0.47 (0.06)                  | 0.54 (0.05)                   |
| 124      | <i>Sphingomonas paucimobilis</i>    | 0.07 (0.0)                   | 1.16 (0.05)                   |
| 2-90     | <i>Embedobacter brevis</i>          | 2.65 (0.79)                  | 0.34 (0.01)                   |
| 2-91     | <i>Embedobacter brevis</i>          | 2.56 (0.26)                  | 0.82 (0.39)                   |
| 11       | <i>Pseudomonas</i> spp.             | 0.32 (0.03)                  | 1.11 (0.08)                   |
| 12       | <i>Pseudomonas</i> spp.             | 0.41 (0.02)                  | 0.82 (0.04)                   |
| 64       | <i>Pseudomonas</i> spp.             | 0.23 (0.08)                  | 1.51 (0.06)                   |
| 56       | <i>P. fluorescens</i>               | 0.98 (0.44)                  | 1.04 (0.11)                   |
| 51       | <i>P. fluorescens</i>               | 0.75 (0.04)                  | 0.75 (0.13)                   |
| 65       | <i>P. putida</i>                    | 0.09 (0.01)                  | 1.43 (0.09)                   |
| 57       | <i>Stenotrophomonas maltophilia</i> | 0.07 (0.01)                  | 0.90 (0.10)                   |
| 2-78     | <i>Methylobacterium exorquens</i>   | 0.24 (0.06)                  | 0.15 (0.01)                   |
| 77       | <i>Methylobacterium</i> spp.        | 0.10 (0.07)                  | 1.24 (0.11)                   |
| 3-70     | <i>Lysinibacillus sphaericus</i>    | 0.12 (0.01)                  | 0.54 (0.06)                   |
| 3-25     | <i>Bacillus</i> spp.                | 0.30 (0.05)                  | 0.75 (0.14)                   |
| 3-52     | <i>B. thuringiensis</i>             | 0.19 (0.01)                  | 1.46 (0.23)                   |
| 2-94     | <i>Staphylococcus cohnii</i>        | 0.06 (0.02)                  | 0.32 (0.15)                   |
| 2-61     | <i>Micrococcus luteus</i>           | 2.47 (0.17)                  | 0.22 (0.04)                   |

**Table S4.** Data plotted on Figure 3 (b). Biomass amount of the single-species biofilms of the isolated bacteria in M63 medium

| Strain № | Bacterial taxon                     | Biofilm, OD <sub>590nm</sub> | Plankton, OD <sub>620nm</sub> |
|----------|-------------------------------------|------------------------------|-------------------------------|
| 4-1      | <i>Sphingomonas</i> spp.            | 0.37 (0.06)                  | 0.44 (0.06)                   |
| 4-2      | <i>Sphingomonas</i> spp.            | 0.47 (0.14)                  | 0.51 (0.03)                   |
| 4-4      | <i>Sphingomonas</i> spp.            | 0.44 (0.08)                  | 1.20 (0.01)                   |
| 124      | <i>Sphingomonas paucimobilis</i>    | 0.26 (0.07)                  | 1.34 (0.08)                   |
| 2-90     | <i>Embedobacter brevis</i>          | 0.42 (0.13)                  | 0.04 (0.01)                   |
| 2-91     | <i>Embedobacter brevis</i>          | 0.40 (0.02)                  | 0.13 (0.02)                   |
| 11       | <i>Pseudomonas</i> spp.             | 0.40 (0.15)                  | 1.90 (0.21)                   |
| 12       | <i>Pseudomonas</i> spp.             | 0.35 (0.12)                  | 1.98 (0.27)                   |
| 64       | <i>Pseudomonas</i> spp.             | 0.34 (0.07)                  | 2.23 (0.03)                   |
| 56       | <i>P. fluorescens</i>               | 3.05 (0.05)                  | 1.28 (0.11)                   |
| 51       | <i>P. fluorescens</i>               | 2.91 (0.04)                  | 1.07 (0.02)                   |
| 65       | <i>P. putida</i>                    | 0.16 (0.06)                  | 1.96 (0.06)                   |
| 57       | <i>Stenotrophomonas maltophilia</i> | 0.10 (0.02)                  | 0.06 (0.004)                  |
| 2-78     | <i>Methylobacterium exorquens</i>   | 0.34 (0.07)                  | 0.70 (0.15)                   |
| 77       | <i>Methylobacterium</i> sp.         | 0.18 (0.02)                  | 0.12 (0.02)                   |
| 3-70     | <i>Lysinibacillus sphaericus</i>    | 0.13 (0.03)                  | 0.05 (0.01)                   |
| 3-25     | <i>Bacillus</i> spp.                | 0.14 (0.03)                  | 0.06 (0.01)                   |
| 3-52     | <i>B. thuringiensis</i>             | 0.14 (0.02)                  | 0.06 (0.01)                   |
| 2-94     | <i>Staphylococcus cohnii</i>        | 0.13 (0.04)                  | 0.024 (0.006)                 |
| 2-61     | <i>Micrococcus luteus</i>           | 0.68 (0.03)                  | 0.008 (0.002)                 |

\*In brackets - standard deviations for the replicates
